# Supplementary material for: Whole genome sequence analysis showing unique SARS-CoV-2 lineages of B.1.524 and AU.2 in Malaysia
Source: PubMed Central journal article supplement (PMC8880882; doi:10.1371/journal.pone.0263678), 2022-02-25
Supplement: pone.0263678.s005.pdf [file pone.0263678.s005.pdf]

**S2 Table 2: Summary of date and D614G variant virus strains from each lineage first detected in Malaysia.**

| Clade     | Lineage   | PANGO lineage description                                                                                        | Date                                                                                                             | Genomes                                                                         |
|-----------|-----------|------------------------------------------------------------------------------------------------------------------|------------------------------------------------------------------------------------------------------------------|---------------------------------------------------------------------------------|
| GH        | AU.2      | Alias of B.1.466.2.2, Malaysia lineage                                                                           | January 3, 2021                                                                                                  | UNIMAS-B195/2021, UNIMAS-B187/2021, UNIMAS-B188/2021                            |
|           | AU.3      | Alias of B.1.466.2.3, predominantly Australia with some Papua New Guinea and Singapore sequences                 | March 25, 2021                                                                                                   | UNIMAS-16844/2021                                                               |
|           | B.1       | A large European lineage the origin of which roughly corresponds to the Northern Italian outbreak early in 2020. | April 7, 2020                                                                                                    | MGI-G873/2020                                                                   |
|           | B.1.111   | South/ Central American lineage (mostly Trinidad and Colombia, a small cluster from Norwich)                     | February 21, 2021                                                                                                | UNIMAS-16404/2021                                                               |
|           | B.1.160   | Large European lineage, sequences from BeNeLuX, Denmark, Switzerland, Hungary and UK.                            | February 3, 2021                                                                                                 | UNIMAS-B186/2021                                                                |
|           | B.1.351   | Lineage of concern detected in South Africa                                                                      | February 1, 2021                                                                                                 | IMR_WC75452/2021                                                                |
|           | B.1.351.3 | Sublineage of B.1.351 predominantly in Bangladesh and Singapore with exports elsewhere                           | May 4, 2021                                                                                                      | IMR_DOB130393/2021, IMR_DOB140382/2021                                          |
|           | B.1.36.16 | SE Asia                                                                                                          | October 16, 2020                                                                                                 | IMR-WI194/2020, IMR-W195I/2020                                                  |
|           | B.1.36.19 | Oceania                                                                                                          | October 28, 2020                                                                                                 | UNIMAS-15723/2020, UNIMAS-15729/2020                                            |
|           | B.1.36.36 | Canada                                                                                                           | March 26, 2020                                                                                                   | NPHL_14135/2020                                                                 |
|           | B.1.36.8  | Prodominantly Indian lineage with global records (inc. Canada)                                                   | January 17, 2021                                                                                                 | IMR_WC39298/2021                                                                |
|           | B.1.428.3 | UAE, Jordan                                                                                                      | October 27, 2020                                                                                                 | MGI-DNALAB12/2020                                                               |
|           | B.1.441   | Global lineage (inc. merge of B.1.274)                                                                           | December 24, 2020                                                                                                | UNIMAS-15834/2020                                                               |
|           | B.1.456   | SE Asian (reassigned)                                                                                            | October 8, 2020                                                                                                  | UNIMAS-15694/2020                                                               |
|           | B.1.466   | Global lineage containing two new sublineages                                                                    | June 9, 2020                                                                                                     | NPHL_98435/2020                                                                 |
|           | B.1.466.2 | Indonesia                                                                                                        | January 10, 2021                                                                                                 | UNIMAS-15877/2021                                                               |
|           | B.1.468   | Indonesia/Singapore. Seq names missassigned in original file                                                     | April 2, 2020                                                                                                    | IUM91/2020                                                                      |
|           | B.1.470   | Indonesia/Singapore                                                                                              | October 14, 2020                                                                                                 | UNIMAS-15695/2020                                                               |
|           | B.1.516   | USA (AZ and NM)                                                                                                  | April 14, 2020                                                                                                   | NPHL_37335/2020                                                                 |
|           | G         | B.1                                                                                                              | A large European lineage the origin of which roughly corresponds to the Northern Italian outbreak early in 2020. | March 31, 2020                                                                  |
| B.1.1.148 |           | US lineage                                                                                                       | November 6, 2020                                                                                                 | UNIMAS-B072/2020                                                                |
| B.1.178   |           | Democratic Republic of the Congo lineage                                                                         | April 10, 2020                                                                                                   | IMR_WC12897/2020                                                                |
| B.1.241   |           | USA lineage                                                                                                      | March 17, 2021                                                                                                   | IMR_WC139765/2021                                                               |
| B.1.36    |           | Global many sublineages                                                                                          | May 4, 2021                                                                                                      | IMR_86285/2021, IMR_180646/2021, IMR_25737/2021, IMR_86009/2021, IMR_85793/2021 |
| B.1.36.10 |           | Jordan/Saudi Arabia (single recent record from USA)                                                              | January 4, 2021                                                                                                  | 8827/2021                                                                       |

**S2 Table 2 -Continue**

| Clade         | Lineage                                                                                                            | PANGO lineage description                                                                                          | Date                                 | Genomes                                                                                                                                                                                                                                                                                                                                                                                                                                                                                         |
|---------------|--------------------------------------------------------------------------------------------------------------------|--------------------------------------------------------------------------------------------------------------------|--------------------------------------|-------------------------------------------------------------------------------------------------------------------------------------------------------------------------------------------------------------------------------------------------------------------------------------------------------------------------------------------------------------------------------------------------------------------------------------------------------------------------------------------------|
| G             | B.1.36.3<br>6                                                                                                      | Canada                                                                                                             | March<br>26,2020                     | NPHL_14135/2020                                                                                                                                                                                                                                                                                                                                                                                                                                                                                 |
|               | B.1.425                                                                                                            | USA lineage                                                                                                        | April 12,2020                        | 8451/2020                                                                                                                                                                                                                                                                                                                                                                                                                                                                                       |
|               | B.1.524                                                                                                            | Malaysian lineage                                                                                                  | September<br>1,2020                  | IMR-CV138548/2020,<br>IMR-CV138551/2020,<br>IMR-CV138687/2020,<br>IMR-CV138815/2020,<br>IMR-CV139140/2020,<br>IMR-CV139154/2020,<br>IMR-CV139158/2020,<br>IMR-CV139176/2020,<br>IMR-CV139206/2020,<br>IMR-CV1140107/2020,<br>IMR-CV140153/2020,<br>IMR-CV140273/2020,<br>IMR-CV140277/2020,<br>IMR-CV140278/2020,<br>IMR-CV140314/2020,<br>IMR-CV140338/2020,<br>IMRCV140352/2020,<br>IMR_CV140342/2020,<br>IMR_CV140329/2020,<br>IMR-CV136859/2020,<br>IMR-CV138522/2020,<br>IMR-CV138523/2020 |
|               | B.1.525                                                                                                            | International lineage with E484K, del69-70 among other defining mutations.                                         | January<br>31,2021                   | IMR_WC74211/2021,<br>IMR_WC74210/2021                                                                                                                                                                                                                                                                                                                                                                                                                                                           |
|               | B.1.560                                                                                                            | India                                                                                                              | April 13,2020                        | UNIMAS-M0710/2020                                                                                                                                                                                                                                                                                                                                                                                                                                                                               |
|               | B.1.617.<br>1                                                                                                      | Predominantly India lineage with 484Q, pango-designation issue #49                                                 | April 10,2021                        | IMR_WC185230/2021                                                                                                                                                                                                                                                                                                                                                                                                                                                                               |
|               | B.1.617.<br>2                                                                                                      | Predominantly India lineage with several spike mutations, pango-designation issue #49                              | April 28,2021                        | IMR_SB68524/2021                                                                                                                                                                                                                                                                                                                                                                                                                                                                                |
|               | B.1.1                                                                                                              | European lineage with 3 clear SNPs `28881GA`, `28882GA`, `28883GC`                                                 | March<br>21,2020                     | 0121/2020                                                                                                                                                                                                                                                                                                                                                                                                                                                                                       |
|               | B.1.1.1                                                                                                            | England                                                                                                            | May 10, 2020                         | IMR_WC55122/2020                                                                                                                                                                                                                                                                                                                                                                                                                                                                                |
|               | B.1.1.29                                                                                                           | Wales lineage, formerly temporarily assigned B.1.1.439 due to an error                                             | March<br>22,2020                     | 0309/2020                                                                                                                                                                                                                                                                                                                                                                                                                                                                                       |
| B.1.1.37<br>0 | England, USA, Russia, Germany                                                                                      | July 27,2020                                                                                                       | IMR-WI085/2020,<br>IMR-WI080/2020    |                                                                                                                                                                                                                                                                                                                                                                                                                                                                                                 |
| B.1.1.39<br>8 | USA/ Indonesian lineage                                                                                            | December<br>7,2020                                                                                                 | IMR_WC317894/2020                    |                                                                                                                                                                                                                                                                                                                                                                                                                                                                                                 |
| B.1.1.63      | Hong Kong lineage                                                                                                  | July 25,2020                                                                                                       | IMR-WI109/2020,<br>IMR-WC124489/2020 |                                                                                                                                                                                                                                                                                                                                                                                                                                                                                                 |
| C.36          | Alias of B.1.1.1.36, Egypt mainly and other countries                                                              | May 29,2020                                                                                                        | IMR_WC90685/2020                     |                                                                                                                                                                                                                                                                                                                                                                                                                                                                                                 |
| P.2           | Alias of B.1.1.28.2, Brazilian lineage                                                                             | December<br>15,2020                                                                                                | IMR_WC348412/2020                    |                                                                                                                                                                                                                                                                                                                                                                                                                                                                                                 |
| P.3           | Alias of B.1.1.28.3, Lineage predominantly in the Philippines with spike mutations E484K, N501Y, P681H, 141-143del | March<br>23,2021                                                                                                   | UNIMAS-16809/2021                    |                                                                                                                                                                                                                                                                                                                                                                                                                                                                                                 |
| GR            | B.1.1                                                                                                              | European lineage with 3 clear SNPs `28881GA`, `28882GA`, `28883GC`                                                 | March<br>21,2020                     | 0121/2020                                                                                                                                                                                                                                                                                                                                                                                                                                                                                       |
|               | B.1.1.1                                                                                                            | England                                                                                                            | May 10, 2020                         | IMR_WC55122/2020                                                                                                                                                                                                                                                                                                                                                                                                                                                                                |
|               | B.1.1.29                                                                                                           | Wales lineage, formerly temporarily assigned B.1.1.439 due to an error                                             | March<br>22,2020                     | 0309/2020                                                                                                                                                                                                                                                                                                                                                                                                                                                                                       |
|               | B.1.1.37<br>0                                                                                                      | England, USA, Russia, Germany                                                                                      | July 27,2020                         | IMR-WI085/2020,<br>IMR-WI080/2020                                                                                                                                                                                                                                                                                                                                                                                                                                                               |
|               | B.1.1.39<br>8                                                                                                      | USA/ Indonesian lineage                                                                                            | December<br>7,2020                   | IMR_WC317894/2020                                                                                                                                                                                                                                                                                                                                                                                                                                                                               |
|               | B.1.1.63                                                                                                           | Hong Kong lineage                                                                                                  | July 25,2020                         | IMR-WI109/2020,<br>IMR-WC124489/2020                                                                                                                                                                                                                                                                                                                                                                                                                                                            |
|               | C.36                                                                                                               | Alias of B.1.1.1.36, Egypt mainly and other countries                                                              | May 29,2020                          | IMR_WC90685/2020                                                                                                                                                                                                                                                                                                                                                                                                                                                                                |
|               | P.2                                                                                                                | Alias of B.1.1.28.2, Brazilian lineage                                                                             | December<br>15,2020                  | IMR_WC348412/2020                                                                                                                                                                                                                                                                                                                                                                                                                                                                               |
|               | P.3                                                                                                                | Alias of B.1.1.28.3, Lineage predominantly in the Philippines with spike mutations E484K, N501Y, P681H, 141-143del | March<br>23,2021                     | UNIMAS-16809/2021                                                                                                                                                                                                                                                                                                                                                                                                                                                                               |

**S2 Table 2 -Continue**

| Clade | Lineage    | PANGO lineage description                                                                                        | Date             | Genomes           |
|-------|------------|------------------------------------------------------------------------------------------------------------------|------------------|-------------------|
| GRY   | B.1.1.7    | UK lineage of concern, associated with the N501Y mutation                                                        | December 28,2020 | IMR_WC378731/2020 |
| GV    | B.1.177.77 | Benelux + Denmark                                                                                                | October 1,2020   | IMR-WC194446/2020 |
| O     | B.1        | A large European lineage the origin of which roughly corresponds to the Northern Italian outbreak early in 2020. | April 2,2020     | UNIMAS-0298/2020  |
|       | B.1.1      | European lineage with 3 clear SNPs `28881GA`, `28882GA`, `28883GC`                                               | March 31,2020    | UNIMAS-0136/2020  |
|       | B.1.560    | India                                                                                                            | April 13,2020    | UNIMAS-1741/2020  |

- The data presented on this table were based on the metadata of patient status downloaded to GISAID, July 19, 2021. Both Malaysian lineage B.1.524 and AU.2 were highlighted in grey. The lineage description listed as described by PANGO (<https://cov-lineages.org/>).
